# Supplementary material for: Evaluation of the long-term efficacy of K-Othrine® PolyZone on three surfaces against laboratory reared Anopheles gambiae in semi-field conditions
Source: Springer Nature journal article supplement (doi:10.1186/s12936-018-2239-z), 2018-02-22
Supplement: MOESM2 [file 15487000]

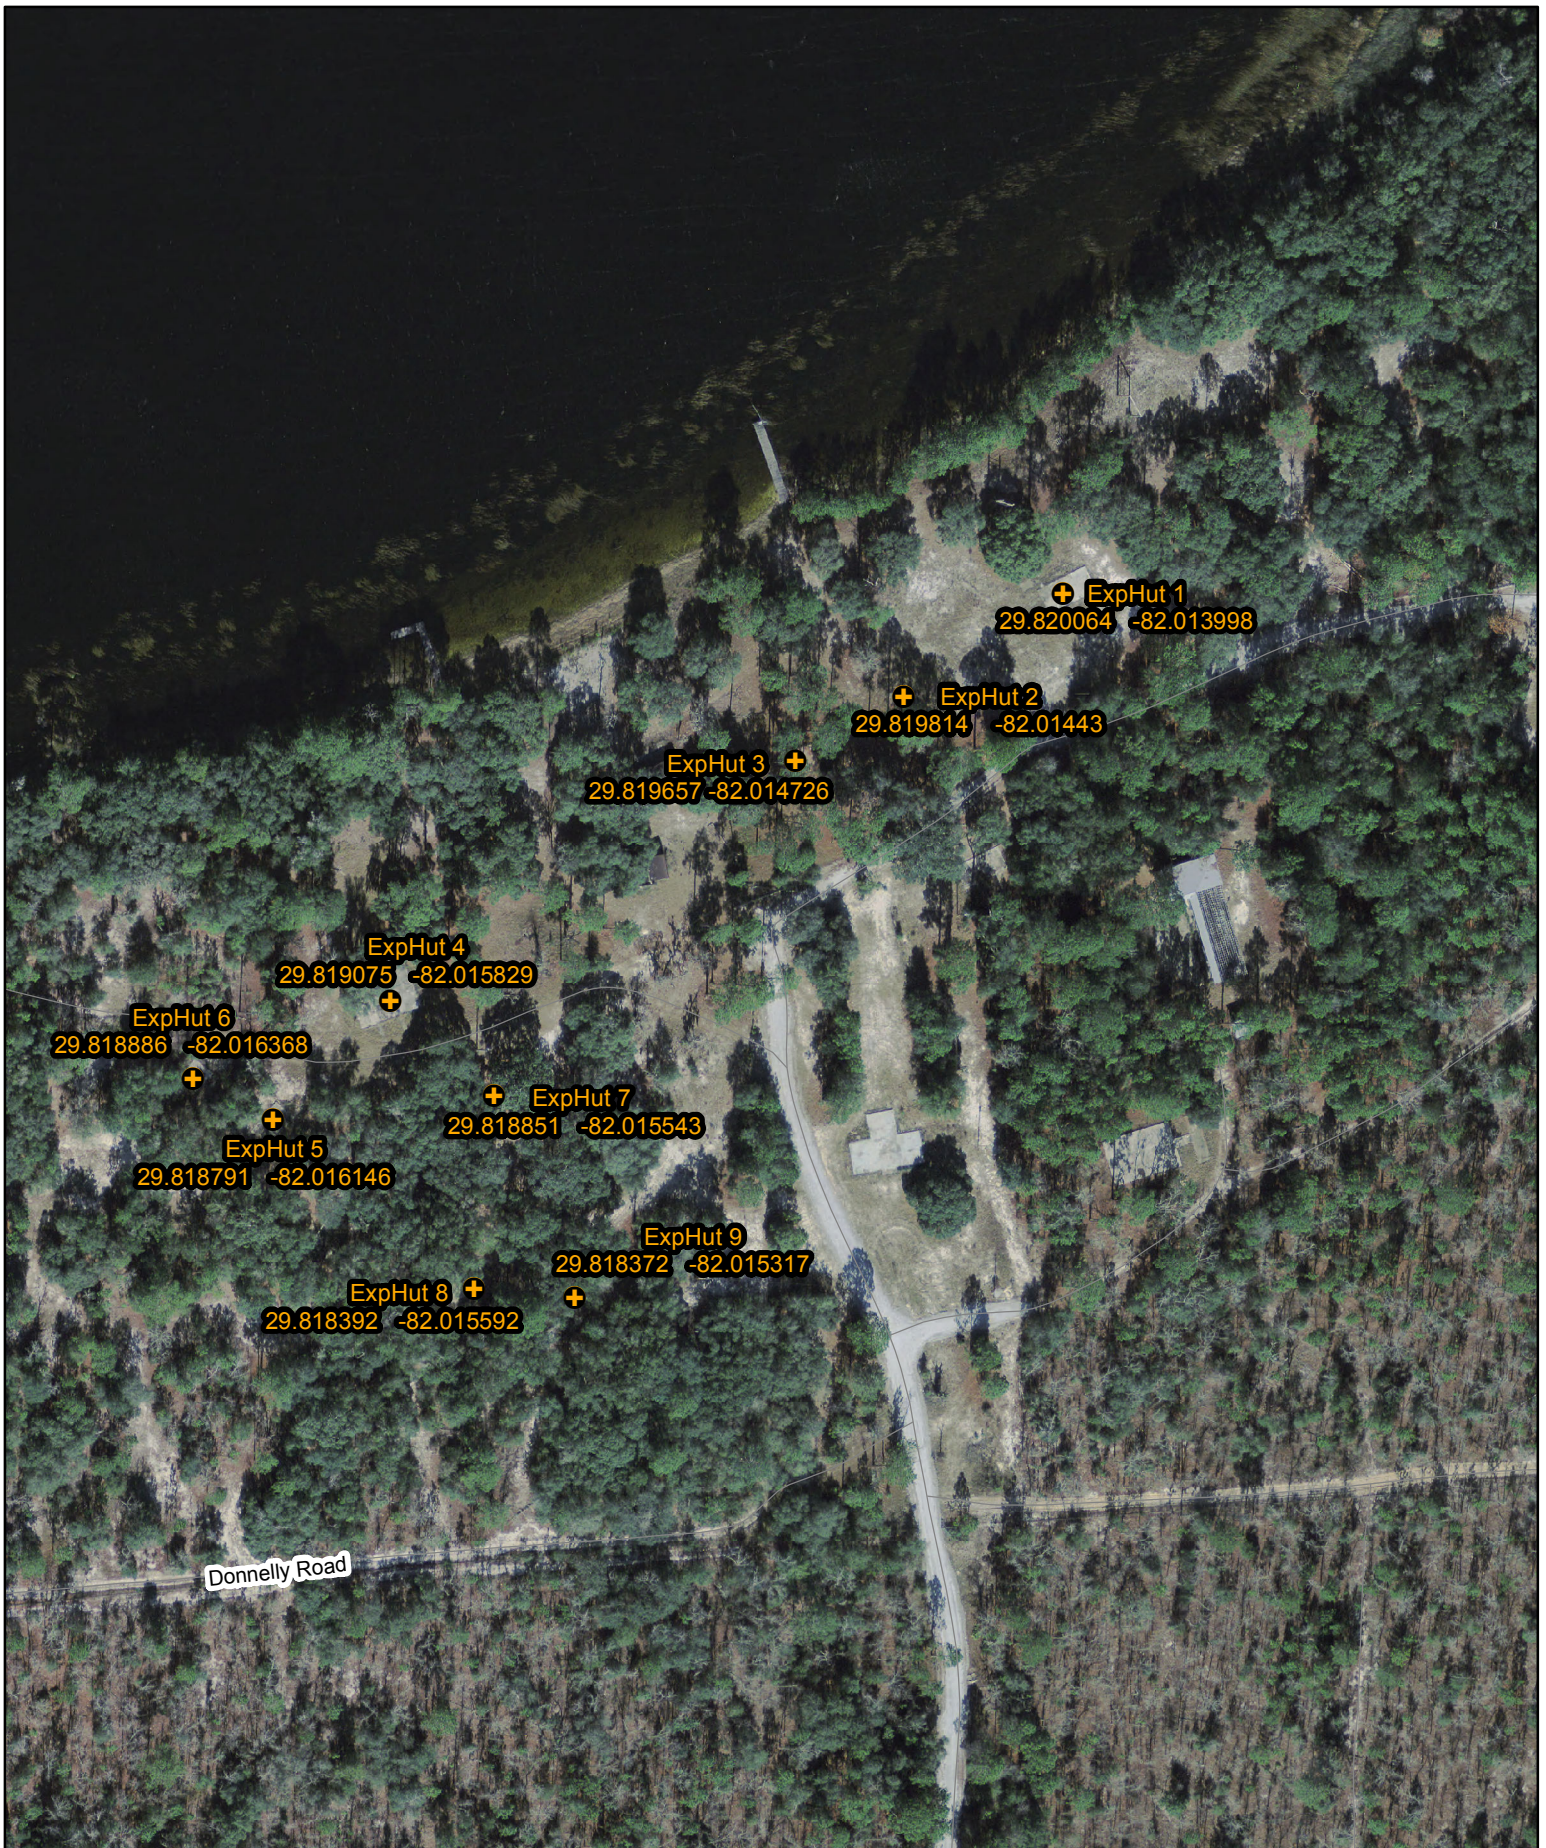

CDC Locations  
**CBJTC Roads**  
 PRIMARY  
 SECONDARY  
 TERTIARY

1:2,000

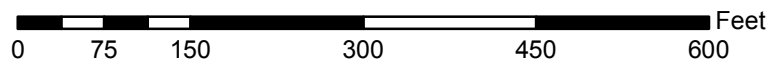

**Camp Blanding Joint Training Center**  
**Starke, Florida 32091**  
**Locations of Experimental Huts used for Panel Aging, R2 Training Area**

Location Map
