# Supplementary material for: Evaluation of the long-term efficacy of K-Othrine® PolyZone on three surfaces against laboratory reared Anopheles gambiae in semi-field conditions
Source: Springer Nature journal article supplement (doi:10.1186/s12936-018-2239-z), 2018-02-22
Supplement: MOESM5 [file 15487000]

R version 3.4.3 (2017-11-30) -- "Kite-Eating Tree"  
 Copyright (C) 2017 The R Foundation for Statistical Computing  
 Platform: x86\_64-w64-mingw32/x64 (64-bit)

R is free software and comes with ABSOLUTELY NO WARRANTY.  
 You are welcome to redistribute it under certain conditions.  
 Type 'license()' or 'licence()' for distribution details.

Natural language support but running in an English locale

R is a collaborative project with many contributors.  
 Type 'contributors()' for more information and  
 'citation()' on how to cite R or R packages in publications.

Type 'demo()' for some demos, 'help()' for on-line help, or  
 'help.start()' for an HTML browser interface to help.  
 Type 'q()' to quit R.

```
> mydata = read.table("D:/Office_C_drive/Documents/Manuscripts/K-Orthine IRS/latest/All_data.csv"
, header=TRUE, fill=TRUE, sep=";")
```

```
> mydata$Time=factor(mydata$Time)
```

```
> summary(mydata)
```

|          | X      | Exposure       | Site        | Treatment | Surface    |
|----------|--------|----------------|-------------|-----------|------------|
| Min. :   | 1.00   | Chamber :99    | CDC : 99    | CTL:132   | Cement:132 |
| 1st Qu.: | 99.75  | Full_Sun :99   | L1 : 33     | DLT:132   | Metal :132 |
| Median : | 198.50 | Partial_Sun:99 | L2 : 33     | DSC:132   | Wood :132  |
| Mean :   | 198.50 | Shade :99      | L3 : 33     |           |            |
| 3rd Qu.: | 297.25 |                | L4 : 33     |           |            |
| Max. :   | 396.00 |                | L5 : 33     |           |            |
|          |        |                | (Other):132 |           |            |

|        | Time | KD30           | Dead24        | Total        |
|--------|------|----------------|---------------|--------------|
| 0.25 : | 36   | Min. : 0.000   | Min. : 0.00   | Min. :24.0   |
| 1 :    | 36   | 1st Qu.: 0.000 | 1st Qu.: 1.00 | 1st Qu.:47.0 |
| 2 :    | 36   | Median : 0.000 | Median :22.00 | Median :50.0 |
| 3 :    | 36   | Mean : 9.288   | Mean :25.09   | Mean :50.6   |
| 4 :    | 36   | 3rd Qu.: 9.000 | 3rd Qu.:47.00 | 3rd Qu.:53.0 |
| 5 :    | 36   | Max. :80.000   | Max. :84.00   | Max. :84.0   |
|        |      | (Other):180    |               |              |

```
> mydata
```

|    | X  | Exposure    | Site | Treatment | Surface | Time | KD30 | Dead24 | Total |
|----|----|-------------|------|-----------|---------|------|------|--------|-------|
| 1  | 1  | Full_Sun    | L1   | CTL       | Wood    | 0.25 | 0    | 1      | 24    |
| 2  | 2  | Partial_Sun | L4   | CTL       | Wood    | 0.25 | 0    | 0      | 79    |
| 3  | 3  | Shade       | L7   | CTL       | Wood    | 0.25 | 0    | 2      | 65    |
| 4  | 4  | Chamber     | CDC  | CTL       | Wood    | 0.25 | 0    | 1      | 61    |
| 5  | 5  | Full_Sun    | L1   | DLT       | Wood    | 0.25 | 0    | 1      | 69    |
| 6  | 6  | Partial_Sun | L4   | DLT       | Wood    | 0.25 | 0    | 0      | 58    |
| 7  | 7  | Shade       | L7   | DLT       | Wood    | 0.25 | 1    | 1      | 63    |
| 8  | 8  | Chamber     | CDC  | DLT       | Wood    | 0.25 | 0    | 1      | 60    |
| 9  | 9  | Full_Sun    | L1   | DSC       | Wood    | 0.25 | 0    | 0      | 70    |
| 10 | 10 | Partial_Sun | L4   | DSC       | Wood    | 0.25 | 0    | 0      | 76    |
| 11 | 11 | Shade       | L7   | DSC       | Wood    | 0.25 | 0    | 4      | 77    |
| 12 | 12 | Chamber     | CDC  | DSC       | Wood    | 0.25 | 1    | 1      | 63    |
| 13 | 13 | Full_Sun    | L2   | CTL       | Cement  | 0.25 | 0    | 2      | 46    |
| 14 | 14 | Partial_Sun | L5   | CTL       | Cement  | 0.25 | 0    | 0      | 59    |
| 15 | 15 | Shade       | L8   | CTL       | Cement  | 0.25 | 0    | 4      | 55    |
| 16 | 16 | Chamber     | CDC  | CTL       | Cement  | 0.25 | 0    | 2      | 53    |
| 17 | 17 | Full_Sun    | L2   | DLT       | Cement  | 0.25 | 52   | 68     | 68    |
| 18 | 18 | Partial_Sun | L5   | DLT       | Cement  | 0.25 | 47   | 61     | 61    |
| 19 | 19 | Shade       | L8   | DLT       | Cement  | 0.25 | 40   | 50     | 50    |
| 20 | 20 | Chamber     | CDC  | DLT       | Cement  | 0.25 | 25   | 58     | 58    |
| 21 | 21 | Full_Sun    | L2   | DSC       | Cement  | 0.25 | 57   | 62     | 62    |
| 22 | 22 | Partial_Sun | L5   | DSC       | Cement  | 0.25 | 27   | 44     | 44    |
| 23 | 23 | Shade       | L8   | DSC       | Cement  | 0.25 | 26   | 52     | 52    |
| 24 | 24 | Chamber     | CDC  | DSC       | Cement  | 0.25 | 42   | 56     | 56    |
| 25 | 25 | Full_Sun    | L3   | CTL       | Metal   | 0.25 | 0    | 0      | 50    |
| 26 | 26 | Partial_Sun | L6   | CTL       | Metal   | 0.25 | 0    | 0      | 61    |
| 27 | 27 | Shade       | L9   | CTL       | Metal   | 0.25 | 0    | 1      | 43    |
| 28 | 28 | Chamber     | CDC  | CTL       | Metal   | 0.25 | 0    | 0      | 41    |

|    |    |             |     |     |        |      |    |    |    |
|----|----|-------------|-----|-----|--------|------|----|----|----|
| 29 | 29 | Full_Sun    | L3  | DLT | Metal  | 0.25 | 35 | 42 | 42 |
| 30 | 30 | Partial_Sun | L6  | DLT | Metal  | 0.25 | 61 | 66 | 66 |
| 31 | 31 | Shade       | L9  | DLT | Metal  | 0.25 | 80 | 84 | 84 |
| 32 | 32 | Chamber     | CDC | DLT | Metal  | 0.25 | 45 | 48 | 48 |
| 33 | 33 | Full_Sun    | L3  | DSC | Metal  | 0.25 | 55 | 56 | 56 |
| 34 | 34 | Partial_Sun | L6  | DSC | Metal  | 0.25 | 59 | 61 | 61 |
| 35 | 35 | Shade       | L9  | DSC | Metal  | 0.25 | 41 | 43 | 43 |
| 36 | 36 | Chamber     | CDC | DSC | Metal  | 0.25 | 39 | 40 | 40 |
| 37 | 37 | Full_Sun    | L1  | CTL | Wood   | 1    | 0  | 2  | 47 |
| 38 | 38 | Partial_Sun | L4  | CTL | Wood   | 1    | 0  | 0  | 53 |
| 39 | 39 | Shade       | L7  | CTL | Wood   | 1    | 0  | 1  | 54 |
| 40 | 40 | Chamber     | CDC | CTL | Wood   | 1    | 0  | 0  | 51 |
| 41 | 41 | Full_Sun    | L1  | DLT | Wood   | 1    | 0  | 20 | 49 |
| 42 | 42 | Partial_Sun | L4  | DLT | Wood   | 1    | 0  | 13 | 46 |
| 43 | 43 | Shade       | L7  | DLT | Wood   | 1    | 0  | 10 | 45 |
| 44 | 44 | Chamber     | CDC | DLT | Wood   | 1    | 0  | 3  | 47 |
| 45 | 45 | Full_Sun    | L1  | DSC | Wood   | 1    | 1  | 47 | 47 |
| 46 | 46 | Partial_Sun | L4  | DSC | Wood   | 1    | 0  | 50 | 50 |
| 47 | 47 | Shade       | L7  | DSC | Wood   | 1    | 0  | 45 | 48 |
| 48 | 48 | Chamber     | CDC | DSC | Wood   | 1    | 0  | 36 | 40 |
| 49 | 49 | Full_Sun    | L2  | CTL | Cement | 1    | 0  | 1  | 56 |
| 50 | 50 | Partial_Sun | L5  | CTL | Cement | 1    | 0  | 0  | 50 |
| 51 | 51 | Shade       | L8  | CTL | Cement | 1    | 0  | 1  | 49 |
| 52 | 52 | Chamber     | CDC | CTL | Cement | 1    | 0  | 0  | 59 |
| 53 | 53 | Full_Sun    | L2  | DLT | Cement | 1    | 0  | 12 | 55 |
| 54 | 54 | Partial_Sun | L5  | DLT | Cement | 1    | 0  | 42 | 54 |
| 55 | 55 | Shade       | L8  | DLT | Cement | 1    | 0  | 44 | 56 |
| 56 | 56 | Chamber     | CDC | DLT | Cement | 1    | 2  | 53 | 53 |
| 57 | 57 | Full_Sun    | L2  | DSC | Cement | 1    | 6  | 57 | 57 |
| 58 | 58 | Partial_Sun | L5  | DSC | Cement | 1    | 7  | 56 | 56 |
| 59 | 59 | Shade       | L8  | DSC | Cement | 1    | 7  | 51 | 51 |
| 60 | 60 | Chamber     | CDC | DSC | Cement | 1    | 5  | 53 | 53 |
| 61 | 61 | Full_Sun    | L3  | CTL | Metal  | 1    | 0  | 0  | 51 |
| 62 | 62 | Partial_Sun | L6  | CTL | Metal  | 1    | 0  | 4  | 45 |
| 63 | 63 | Shade       | L9  | CTL | Metal  | 1    | 0  | 0  | 42 |
| 64 | 64 | Chamber     | CDC | CTL | Metal  | 1    | 0  | 0  | 45 |
| 65 | 65 | Full_Sun    | L3  | DLT | Metal  | 1    | 62 | 65 | 65 |
| 66 | 66 | Partial_Sun | L6  | DLT | Metal  | 1    | 46 | 46 | 46 |
| 67 | 67 | Shade       | L9  | DLT | Metal  | 1    | 41 | 42 | 42 |
| 68 | 68 | Chamber     | CDC | DLT | Metal  | 1    | 49 | 49 | 49 |
| 69 | 69 | Full_Sun    | L3  | DSC | Metal  | 1    | 50 | 52 | 52 |
| 70 | 70 | Partial_Sun | L6  | DSC | Metal  | 1    | 49 | 50 | 50 |
| 71 | 71 | Shade       | L9  | DSC | Metal  | 1    | 39 | 52 | 52 |
| 72 | 72 | Chamber     | CDC | DSC | Metal  | 1    | 48 | 48 | 48 |
| 73 | 73 | Full_Sun    | L1  | CTL | Wood   | 2    | 0  | 1  | 49 |
| 74 | 74 | Partial_Sun | L4  | CTL | Wood   | 2    | 0  | 1  | 46 |
| 75 | 75 | Shade       | L7  | CTL | Wood   | 2    | 0  | 0  | 49 |
| 76 | 76 | Chamber     | CDC | CTL | Wood   | 2    | 0  | 1  | 49 |
| 77 | 77 | Full_Sun    | L1  | DLT | Wood   | 2    | 0  | 35 | 48 |
| 78 | 78 | Partial_Sun | L4  | DLT | Wood   | 2    | 0  | 34 | 49 |
| 79 | 79 | Shade       | L7  | DLT | Wood   | 2    | 0  | 19 | 54 |
| 80 | 80 | Chamber     | CDC | DLT | Wood   | 2    | 0  | 7  | 49 |
| 81 | 81 | Full_Sun    | L1  | DSC | Wood   | 2    | 0  | 43 | 44 |
| 82 | 82 | Partial_Sun | L4  | DSC | Wood   | 2    | 0  | 48 | 55 |
| 83 | 83 | Shade       | L7  | DSC | Wood   | 2    | 0  | 44 | 50 |
| 84 | 84 | Chamber     | CDC | DSC | Wood   | 2    | 0  | 44 | 50 |
| 85 | 85 | Full_Sun    | L2  | CTL | Cement | 2    | 0  | 0  | 46 |
| 86 | 86 | Partial_Sun | L5  | CTL | Cement | 2    | 0  | 0  | 52 |
| 87 | 87 | Shade       | L8  | CTL | Cement | 2    | 0  | 0  | 55 |
| 88 | 88 | Chamber     | CDC | CTL | Cement | 2    | 0  | 2  | 44 |
| 89 | 89 | Full_Sun    | L2  | DLT | Cement | 2    | 0  | 26 | 42 |
| 90 | 90 | Partial_Sun | L5  | DLT | Cement | 2    | 0  | 38 | 48 |
| 91 | 91 | Shade       | L8  | DLT | Cement | 2    | 0  | 3  | 42 |
| 92 | 92 | Chamber     | CDC | DLT | Cement | 2    | 0  | 24 | 48 |
| 93 | 93 | Full_Sun    | L2  | DSC | Cement | 2    | 4  | 46 | 48 |
| 94 | 94 | Partial_Sun | L5  | DSC | Cement | 2    | 1  | 47 | 47 |
| 95 | 95 | Shade       | L8  | DSC | Cement | 2    | 10 | 47 | 47 |
| 96 | 96 | Chamber     | CDC | DSC | Cement | 2    | 0  | 50 | 50 |
| 97 | 97 | Full_Sun    | L3  | CTL | Metal  | 2    | 0  | 0  | 43 |
| 98 | 98 | Partial_Sun | L6  | CTL | Metal  | 2    | 0  | 0  | 46 |

|     |     |             |     |     |        |   |    |    |    |
|-----|-----|-------------|-----|-----|--------|---|----|----|----|
| 99  | 99  | Shade       | L9  | CTL | Metal  | 2 | 0  | 0  | 45 |
| 100 | 100 | Chamber     | CDC | CTL | Metal  | 2 | 0  | 0  | 40 |
| 101 | 101 | Full_Sun    | L3  | DLT | Metal  | 2 | 25 | 49 | 49 |
| 102 | 102 | Partial_Sun | L6  | DLT | Metal  | 2 | 41 | 44 | 44 |
| 103 | 103 | Shade       | L9  | DLT | Metal  | 2 | 38 | 46 | 46 |
| 104 | 104 | Chamber     | CDC | DLT | Metal  | 2 | 44 | 46 | 46 |
| 105 | 105 | Full_Sun    | L3  | DSC | Metal  | 2 | 40 | 48 | 48 |
| 106 | 106 | Partial_Sun | L6  | DSC | Metal  | 2 | 40 | 51 | 51 |
| 107 | 107 | Shade       | L9  | DSC | Metal  | 2 | 36 | 45 | 45 |
| 108 | 108 | Chamber     | CDC | DSC | Metal  | 2 | 25 | 33 | 33 |
| 109 | 109 | Full_Sun    | L1  | CTL | Wood   | 3 | 0  | 0  | 53 |
| 110 | 110 | Partial_Sun | L4  | CTL | Wood   | 3 | 0  | 0  | 53 |
| 111 | 111 | Shade       | L7  | CTL | Wood   | 3 | 0  | 0  | 55 |
| 112 | 112 | Chamber     | CDC | CTL | Wood   | 3 | 0  | 1  | 52 |
| 113 | 113 | Full_Sun    | L1  | DLT | Wood   | 3 | 0  | 28 | 57 |
| 114 | 114 | Partial_Sun | L4  | DLT | Wood   | 3 | 0  | 5  | 51 |
| 115 | 115 | Shade       | L7  | DLT | Wood   | 3 | 0  | 2  | 55 |
| 116 | 116 | Chamber     | CDC | DLT | Wood   | 3 | 0  | 2  | 55 |
| 117 | 117 | Full_Sun    | L1  | DSC | Wood   | 3 | 0  | 37 | 47 |
| 118 | 118 | Partial_Sun | L4  | DSC | Wood   | 3 | 1  | 43 | 51 |
| 119 | 119 | Shade       | L7  | DSC | Wood   | 3 | 1  | 40 | 53 |
| 120 | 120 | Chamber     | CDC | DSC | Wood   | 3 | 0  | 35 | 58 |
| 121 | 121 | Full_Sun    | L2  | CTL | Cement | 3 | 0  | 1  | 45 |
| 122 | 122 | Partial_Sun | L5  | CTL | Cement | 3 | 0  | 0  | 53 |
| 123 | 123 | Shade       | L8  | CTL | Cement | 3 | 0  | 0  | 50 |
| 124 | 124 | Chamber     | CDC | CTL | Cement | 3 | 0  | 1  | 49 |
| 125 | 125 | Full_Sun    | L2  | DLT | Cement | 3 | 3  | 48 | 50 |
| 126 | 126 | Partial_Sun | L5  | DLT | Cement | 3 | 0  | 40 | 46 |
| 127 | 127 | Shade       | L8  | DLT | Cement | 3 | 0  | 34 | 47 |
| 128 | 128 | Chamber     | CDC | DLT | Cement | 3 | 0  | 24 | 46 |
| 129 | 129 | Full_Sun    | L2  | DSC | Cement | 3 | 2  | 50 | 50 |
| 130 | 130 | Partial_Sun | L5  | DSC | Cement | 3 | 17 | 52 | 52 |
| 131 | 131 | Shade       | L8  | DSC | Cement | 3 | 12 | 51 | 51 |
| 132 | 132 | Chamber     | CDC | DSC | Cement | 3 | 3  | 46 | 46 |
| 133 | 133 | Full_Sun    | L3  | CTL | Metal  | 3 | 0  | 1  | 52 |
| 134 | 134 | Partial_Sun | L6  | CTL | Metal  | 3 | 0  | 2  | 56 |
| 135 | 135 | Shade       | L9  | CTL | Metal  | 3 | 0  | 2  | 48 |
| 136 | 136 | Chamber     | CDC | CTL | Metal  | 3 | 0  | 1  | 44 |
| 137 | 137 | Full_Sun    | L3  | DLT | Metal  | 3 | 15 | 50 | 50 |
| 138 | 138 | Partial_Sun | L6  | DLT | Metal  | 3 | 25 | 51 | 51 |
| 139 | 139 | Shade       | L9  | DLT | Metal  | 3 | 12 | 49 | 49 |
| 140 | 140 | Chamber     | CDC | DLT | Metal  | 3 | 51 | 55 | 55 |
| 141 | 141 | Full_Sun    | L3  | DSC | Metal  | 3 | 54 | 57 | 57 |
| 142 | 142 | Partial_Sun | L6  | DSC | Metal  | 3 | 34 | 52 | 52 |
| 143 | 143 | Shade       | L9  | DSC | Metal  | 3 | 25 | 50 | 50 |
| 144 | 144 | Chamber     | CDC | DSC | Metal  | 3 | 53 | 53 | 53 |
| 145 | 145 | Full_Sun    | L1  | CTL | Wood   | 4 | 0  | 2  | 40 |
| 146 | 146 | Partial_Sun | L4  | CTL | Wood   | 4 | 0  | 1  | 49 |
| 147 | 147 | Shade       | L7  | CTL | Wood   | 4 | 0  | 0  | 47 |
| 148 | 148 | Chamber     | CDC | CTL | Wood   | 4 | 0  | 2  | 49 |
| 149 | 149 | Full_Sun    | L1  | DLT | Wood   | 4 | 1  | 22 | 46 |
| 150 | 150 | Partial_Sun | L4  | DLT | Wood   | 4 | 0  | 11 | 50 |
| 151 | 151 | Shade       | L7  | DLT | Wood   | 4 | 0  | 14 | 49 |
| 152 | 152 | Chamber     | CDC | DLT | Wood   | 4 | 2  | 44 | 49 |
| 153 | 153 | Full_Sun    | L1  | DSC | Wood   | 4 | 0  | 41 | 46 |
| 154 | 154 | Partial_Sun | L4  | DSC | Wood   | 4 | 0  | 28 | 35 |
| 155 | 155 | Shade       | L7  | DSC | Wood   | 4 | 0  | 46 | 49 |
| 156 | 156 | Chamber     | CDC | DSC | Wood   | 4 | 3  | 48 | 48 |
| 157 | 157 | Full_Sun    | L2  | CTL | Cement | 4 | 0  | 1  | 51 |
| 158 | 158 | Partial_Sun | L5  | CTL | Cement | 4 | 0  | 3  | 50 |
| 159 | 159 | Shade       | L8  | CTL | Cement | 4 | 0  | 2  | 52 |
| 160 | 160 | Chamber     | CDC | CTL | Cement | 4 | 0  | 1  | 49 |
| 161 | 161 | Full_Sun    | L2  | DLT | Cement | 4 | 0  | 43 | 50 |
| 162 | 162 | Partial_Sun | L5  | DLT | Cement | 4 | 0  | 34 | 53 |
| 163 | 163 | Shade       | L8  | DLT | Cement | 4 | 0  | 33 | 47 |
| 164 | 164 | Chamber     | CDC | DLT | Cement | 4 | 0  | 32 | 53 |
| 165 | 165 | Full_Sun    | L2  | DSC | Cement | 4 | 1  | 50 | 50 |
| 166 | 166 | Partial_Sun | L5  | DSC | Cement | 4 | 17 | 53 | 53 |
| 167 | 167 | Shade       | L8  | DSC | Cement | 4 | 5  | 47 | 47 |
| 168 | 168 | Chamber     | CDC | DSC | Cement | 4 | 15 | 47 | 47 |

|     |     |             |     |     |        |   |    |    |    |
|-----|-----|-------------|-----|-----|--------|---|----|----|----|
| 169 | 169 | Full_Sun    | L3  | CTL | Metal  | 4 | 0  | 0  | 48 |
| 170 | 170 | Partial_Sun | L6  | CTL | Metal  | 4 | 0  | 0  | 49 |
| 171 | 171 | Shade       | L9  | CTL | Metal  | 4 | 1  | 1  | 52 |
| 172 | 172 | Chamber     | CDC | CTL | Metal  | 4 | 0  | 3  | 56 |
| 173 | 173 | Full_Sun    | L3  | DLT | Metal  | 4 | 26 | 50 | 50 |
| 174 | 174 | Partial_Sun | L6  | DLT | Metal  | 4 | 26 | 44 | 44 |
| 175 | 175 | Shade       | L9  | DLT | Metal  | 4 | 39 | 51 | 51 |
| 176 | 176 | Chamber     | CDC | DLT | Metal  | 4 | 49 | 52 | 52 |
| 177 | 177 | Full_Sun    | L3  | DSC | Metal  | 4 | 27 | 47 | 47 |
| 178 | 178 | Partial_Sun | L6  | DSC | Metal  | 4 | 46 | 51 | 51 |
| 179 | 179 | Shade       | L9  | DSC | Metal  | 4 | 43 | 50 | 50 |
| 180 | 180 | Chamber     | CDC | DSC | Metal  | 4 | 51 | 51 | 51 |
| 181 | 181 | Full_Sun    | L1  | CTL | Wood   | 5 | 0  | 2  | 57 |
| 182 | 182 | Partial_Sun | L4  | CTL | Wood   | 5 | 0  | 1  | 60 |
| 183 | 183 | Shade       | L7  | CTL | Wood   | 5 | 0  | 2  | 54 |
| 184 | 184 | Chamber     | CDC | CTL | Wood   | 5 | 0  | 2  | 50 |
| 185 | 185 | Full_Sun    | L1  | DLT | Wood   | 5 | 0  | 53 | 57 |
| 186 | 186 | Partial_Sun | L4  | DLT | Wood   | 5 | 0  | 31 | 53 |
| 187 | 187 | Shade       | L7  | DLT | Wood   | 5 | 0  | 24 | 51 |
| 188 | 188 | Chamber     | CDC | DLT | Wood   | 5 | 0  | 35 | 53 |
| 189 | 189 | Full_Sun    | L1  | DSC | Wood   | 5 | 0  | 45 | 45 |
| 190 | 190 | Partial_Sun | L4  | DSC | Wood   | 5 | 0  | 54 | 54 |
| 191 | 191 | Shade       | L7  | DSC | Wood   | 5 | 0  | 47 | 48 |
| 192 | 192 | Chamber     | CDC | DSC | Wood   | 5 | 0  | 49 | 51 |
| 193 | 193 | Full_Sun    | L2  | CTL | Cement | 5 | 0  | 0  | 49 |
| 194 | 194 | Partial_Sun | L5  | CTL | Cement | 5 | 0  | 0  | 49 |
| 195 | 195 | Shade       | L8  | CTL | Cement | 5 | 0  | 3  | 53 |
| 196 | 196 | Chamber     | CDC | CTL | Cement | 5 | 0  | 1  | 60 |
| 197 | 197 | Full_Sun    | L2  | DLT | Cement | 5 | 0  | 15 | 54 |
| 198 | 198 | Partial_Sun | L5  | DLT | Cement | 5 | 0  | 12 | 51 |
| 199 | 199 | Shade       | L8  | DLT | Cement | 5 | 0  | 20 | 46 |
| 200 | 200 | Chamber     | CDC | DLT | Cement | 5 | 0  | 12 | 51 |
| 201 | 201 | Full_Sun    | L2  | DSC | Cement | 5 | 0  | 48 | 50 |
| 202 | 202 | Partial_Sun | L5  | DSC | Cement | 5 | 4  | 52 | 52 |
| 203 | 203 | Shade       | L8  | DSC | Cement | 5 | 3  | 50 | 52 |
| 204 | 204 | Chamber     | CDC | DSC | Cement | 5 | 4  | 49 | 49 |
| 205 | 205 | Full_Sun    | L3  | CTL | Metal  | 5 | 0  | 0  | 46 |
| 206 | 206 | Partial_Sun | L6  | CTL | Metal  | 5 | 0  | 0  | 48 |
| 207 | 207 | Shade       | L9  | CTL | Metal  | 5 | 0  | 1  | 50 |
| 208 | 208 | Chamber     | CDC | CTL | Metal  | 5 | 0  | 1  | 49 |
| 209 | 209 | Full_Sun    | L3  | DLT | Metal  | 5 | 26 | 41 | 44 |
| 210 | 210 | Partial_Sun | L6  | DLT | Metal  | 5 | 18 | 45 | 45 |
| 211 | 211 | Shade       | L9  | DLT | Metal  | 5 | 35 | 50 | 50 |
| 212 | 212 | Chamber     | CDC | DLT | Metal  | 5 | 46 | 49 | 49 |
| 213 | 213 | Full_Sun    | L3  | DSC | Metal  | 5 | 40 | 48 | 48 |
| 214 | 214 | Partial_Sun | L6  | DSC | Metal  | 5 | 44 | 48 | 48 |
| 215 | 215 | Shade       | L9  | DSC | Metal  | 5 | 30 | 48 | 48 |
| 216 | 216 | Chamber     | CDC | DSC | Metal  | 5 | 49 | 60 | 60 |
| 217 | 217 | Full_Sun    | L1  | CTL | Wood   | 6 | 0  | 1  | 56 |
| 218 | 218 | Partial_Sun | L4  | CTL | Wood   | 6 | 0  | 3  | 52 |
| 219 | 219 | Shade       | L7  | CTL | Wood   | 6 | 0  | 2  | 54 |
| 220 | 220 | Chamber     | CDC | CTL | Wood   | 6 | 0  | 4  | 53 |
| 221 | 221 | Full_Sun    | L1  | DLT | Wood   | 6 | 0  | 43 | 53 |
| 222 | 222 | Partial_Sun | L4  | DLT | Wood   | 6 | 0  | 12 | 52 |
| 223 | 223 | Shade       | L7  | DLT | Wood   | 6 | 0  | 18 | 49 |
| 224 | 224 | Chamber     | CDC | DLT | Wood   | 6 | 0  | 40 | 45 |
| 225 | 225 | Full_Sun    | L1  | DSC | Wood   | 6 | 0  | 51 | 54 |
| 226 | 226 | Partial_Sun | L4  | DSC | Wood   | 6 | 0  | 44 | 50 |
| 227 | 227 | Shade       | L7  | DSC | Wood   | 6 | 0  | 38 | 53 |
| 228 | 228 | Chamber     | CDC | DSC | Wood   | 6 | 13 | 55 | 57 |
| 229 | 229 | Full_Sun    | L2  | CTL | Cement | 6 | 0  | 0  | 53 |
| 230 | 230 | Partial_Sun | L5  | CTL | Cement | 6 | 0  | 5  | 49 |
| 231 | 231 | Shade       | L8  | CTL | Cement | 6 | 0  | 8  | 54 |
| 232 | 232 | Chamber     | CDC | CTL | Cement | 6 | 0  | 12 | 51 |
| 233 | 233 | Full_Sun    | L2  | DLT | Cement | 6 | 0  | 45 | 54 |
| 234 | 234 | Partial_Sun | L5  | DLT | Cement | 6 | 1  | 41 | 57 |
| 235 | 235 | Shade       | L8  | DLT | Cement | 6 | 0  | 19 | 44 |
| 236 | 236 | Chamber     | CDC | DLT | Cement | 6 | 0  | 42 | 54 |
| 237 | 237 | Full_Sun    | L2  | DSC | Cement | 6 | 0  | 37 | 50 |
| 238 | 238 | Partial_Sun | L5  | DSC | Cement | 6 | 12 | 50 | 50 |

|     |     |             |     |     |        |   |    |    |    |
|-----|-----|-------------|-----|-----|--------|---|----|----|----|
| 239 | 239 | Shade       | L8  | DSC | Cement | 6 | 21 | 51 | 51 |
| 240 | 240 | Chamber     | CDC | DSC | Cement | 6 | 36 | 59 | 59 |
| 241 | 241 | Full_Sun    | L3  | CTL | Metal  | 6 | 0  | 1  | 53 |
| 242 | 242 | Partial_Sun | L6  | CTL | Metal  | 6 | 0  | 0  | 58 |
| 243 | 243 | Shade       | L9  | CTL | Metal  | 6 | 0  | 1  | 56 |
| 244 | 244 | Chamber     | CDC | CTL | Metal  | 6 | 0  | 2  | 57 |
| 245 | 245 | Full_Sun    | L3  | DLT | Metal  | 6 | 16 | 49 | 57 |
| 246 | 246 | Partial_Sun | L6  | DLT | Metal  | 6 | 34 | 54 | 54 |
| 247 | 247 | Shade       | L9  | DLT | Metal  | 6 | 23 | 52 | 55 |
| 248 | 248 | Chamber     | CDC | DLT | Metal  | 6 | 48 | 48 | 48 |
| 249 | 249 | Full_Sun    | L3  | DSC | Metal  | 6 | 29 | 56 | 56 |
| 250 | 250 | Partial_Sun | L6  | DSC | Metal  | 6 | 47 | 50 | 50 |
| 251 | 251 | Shade       | L9  | DSC | Metal  | 6 | 37 | 52 | 52 |
| 252 | 252 | Chamber     | CDC | DSC | Metal  | 6 | 40 | 47 | 47 |
| 253 | 253 | Full_Sun    | L1  | CTL | Wood   | 7 | 0  | 1  | 50 |
| 254 | 254 | Partial_Sun | L4  | CTL | Wood   | 7 | 0  | 3  | 48 |
| 255 | 255 | Shade       | L7  | CTL | Wood   | 7 | 1  | 2  | 50 |
| 256 | 256 | Chamber     | CDC | CTL | Wood   | 7 | 0  | 0  | 49 |
| 257 | 257 | Full_Sun    | L1  | DLT | Wood   | 7 | 1  | 25 | 39 |
| 258 | 258 | Partial_Sun | L4  | DLT | Wood   | 7 | 0  | 19 | 39 |
| 259 | 259 | Shade       | L7  | DLT | Wood   | 7 | 0  | 11 | 60 |
| 260 | 260 | Chamber     | CDC | DLT | Wood   | 7 | 0  | 19 | 54 |
| 261 | 261 | Full_Sun    | L1  | DSC | Wood   | 7 | 0  | 40 | 47 |
| 262 | 262 | Partial_Sun | L4  | DSC | Wood   | 7 | 0  | 23 | 47 |
| 263 | 263 | Shade       | L7  | DSC | Wood   | 7 | 0  | 17 | 42 |
| 264 | 264 | Chamber     | CDC | DSC | Wood   | 7 | 0  | 17 | 53 |
| 265 | 265 | Full_Sun    | L2  | CTL | Cement | 7 | 0  | 0  | 54 |
| 266 | 266 | Partial_Sun | L5  | CTL | Cement | 7 | 0  | 2  | 46 |
| 267 | 267 | Shade       | L8  | CTL | Cement | 7 | 0  | 0  | 47 |
| 268 | 268 | Chamber     | CDC | CTL | Cement | 7 | 0  | 3  | 42 |
| 269 | 269 | Full_Sun    | L2  | DLT | Cement | 7 | 0  | 6  | 45 |
| 270 | 270 | Partial_Sun | L5  | DLT | Cement | 7 | 0  | 13 | 51 |
| 271 | 271 | Shade       | L8  | DLT | Cement | 7 | 0  | 5  | 47 |
| 272 | 272 | Chamber     | CDC | DLT | Cement | 7 | 0  | 9  | 45 |
| 273 | 273 | Full_Sun    | L2  | DSC | Cement | 7 | 4  | 46 | 46 |
| 274 | 274 | Partial_Sun | L5  | DSC | Cement | 7 | 0  | 45 | 47 |
| 275 | 275 | Shade       | L8  | DSC | Cement | 7 | 0  | 44 | 48 |
| 276 | 276 | Chamber     | CDC | DSC | Cement | 7 | 6  | 45 | 45 |
| 277 | 277 | Full_Sun    | L3  | CTL | Metal  | 7 | 0  | 0  | 50 |
| 278 | 278 | Partial_Sun | L6  | CTL | Metal  | 7 | 0  | 0  | 54 |
| 279 | 279 | Shade       | L9  | CTL | Metal  | 7 | 0  | 1  | 54 |
| 280 | 280 | Chamber     | CDC | CTL | Metal  | 7 | 0  | 0  | 46 |
| 281 | 281 | Full_Sun    | L3  | DLT | Metal  | 7 | 3  | 31 | 46 |
| 282 | 282 | Partial_Sun | L6  | DLT | Metal  | 7 | 11 | 41 | 45 |
| 283 | 283 | Shade       | L9  | DLT | Metal  | 7 | 2  | 43 | 52 |
| 284 | 284 | Chamber     | CDC | DLT | Metal  | 7 | 53 | 59 | 59 |
| 285 | 285 | Full_Sun    | L3  | DSC | Metal  | 7 | 36 | 54 | 56 |
| 286 | 286 | Partial_Sun | L6  | DSC | Metal  | 7 | 32 | 56 | 58 |
| 287 | 287 | Shade       | L9  | DSC | Metal  | 7 | 16 | 39 | 40 |
| 288 | 288 | Chamber     | CDC | DSC | Metal  | 7 | 45 | 53 | 53 |
| 289 | 289 | Full_Sun    | L1  | CTL | Wood   | 8 | 0  | 0  | 51 |
| 290 | 290 | Partial_Sun | L4  | CTL | Wood   | 8 | 0  | 0  | 59 |
| 291 | 291 | Shade       | L7  | CTL | Wood   | 8 | 0  | 1  | 49 |
| 292 | 292 | Chamber     | CDC | CTL | Wood   | 8 | 0  | 0  | 45 |
| 293 | 293 | Full_Sun    | L1  | DLT | Wood   | 8 | 0  | 2  | 44 |
| 294 | 294 | Partial_Sun | L4  | DLT | Wood   | 8 | 0  | 4  | 43 |
| 295 | 295 | Shade       | L7  | DLT | Wood   | 8 | 0  | 1  | 43 |
| 296 | 296 | Chamber     | CDC | DLT | Wood   | 8 | 0  | 14 | 51 |
| 297 | 297 | Full_Sun    | L1  | DSC | Wood   | 8 | 0  | 19 | 49 |
| 298 | 298 | Partial_Sun | L4  | DSC | Wood   | 8 | 0  | 20 | 52 |
| 299 | 299 | Shade       | L7  | DSC | Wood   | 8 | 0  | 12 | 56 |
| 300 | 300 | Chamber     | CDC | DSC | Wood   | 8 | 0  | 22 | 53 |
| 301 | 301 | Full_Sun    | L2  | CTL | Cement | 8 | 0  | 1  | 51 |
| 302 | 302 | Partial_Sun | L5  | CTL | Cement | 8 | 0  | 1  | 49 |
| 303 | 303 | Shade       | L8  | CTL | Cement | 8 | 0  | 0  | 45 |
| 304 | 304 | Chamber     | CDC | CTL | Cement | 8 | 0  | 1  | 51 |
| 305 | 305 | Full_Sun    | L2  | DLT | Cement | 8 | 0  | 39 | 50 |
| 306 | 306 | Partial_Sun | L5  | DLT | Cement | 8 | 0  | 19 | 58 |
| 307 | 307 | Shade       | L8  | DLT | Cement | 8 | 0  | 11 | 50 |
| 308 | 308 | Chamber     | CDC | DLT | Cement | 8 | 0  | 6  | 51 |

|     |     |             |     |     |        |    |    |    |    |
|-----|-----|-------------|-----|-----|--------|----|----|----|----|
| 309 | 309 | Full_Sun    | L2  | DSC | Cement | 8  | 0  | 45 | 46 |
| 310 | 310 | Partial_Sun | L5  | DSC | Cement | 8  | 0  | 47 | 47 |
| 311 | 311 | Shade       | L8  | DSC | Cement | 8  | 3  | 44 | 45 |
| 312 | 312 | Chamber     | CDC | DSC | Cement | 8  | 0  | 42 | 42 |
| 313 | 313 | Full_Sun    | L3  | CTL | Metal  | 8  | 0  | 0  | 52 |
| 314 | 314 | Partial_Sun | L6  | CTL | Metal  | 8  | 0  | 1  | 45 |
| 315 | 315 | Shade       | L9  | CTL | Metal  | 8  | 0  | 2  | 46 |
| 316 | 316 | Chamber     | CDC | CTL | Metal  | 8  | 0  | 0  | 52 |
| 317 | 317 | Full_Sun    | L3  | DLT | Metal  | 8  | 9  | 38 | 49 |
| 318 | 318 | Partial_Sun | L6  | DLT | Metal  | 8  | 5  | 15 | 52 |
| 319 | 319 | Shade       | L9  | DLT | Metal  | 8  | 8  | 31 | 47 |
| 320 | 320 | Chamber     | CDC | DLT | Metal  | 8  | 49 | 52 | 52 |
| 321 | 321 | Full_Sun    | L3  | DSC | Metal  | 8  | 15 | 45 | 47 |
| 322 | 322 | Partial_Sun | L6  | DSC | Metal  | 8  | 42 | 51 | 51 |
| 323 | 323 | Shade       | L9  | DSC | Metal  | 8  | 21 | 51 | 51 |
| 324 | 324 | Chamber     | CDC | DSC | Metal  | 8  | 47 | 54 | 54 |
| 325 | 325 | Full_Sun    | L1  | CTL | Wood   | 9  | 0  | 0  | 53 |
| 326 | 326 | Partial_Sun | L4  | CTL | Wood   | 9  | 0  | 1  | 48 |
| 327 | 327 | Shade       | L7  | CTL | Wood   | 9  | 0  | 0  | 51 |
| 328 | 328 | Chamber     | CDC | CTL | Wood   | 9  | 0  | 1  | 57 |
| 329 | 329 | Full_Sun    | L1  | DLT | Wood   | 9  | 0  | 7  | 50 |
| 330 | 330 | Partial_Sun | L4  | DLT | Wood   | 9  | 0  | 4  | 46 |
| 331 | 331 | Shade       | L7  | DLT | Wood   | 9  | 0  | 1  | 49 |
| 332 | 332 | Chamber     | CDC | DLT | Wood   | 9  | 0  | 22 | 51 |
| 333 | 333 | Full_Sun    | L1  | DSC | Wood   | 9  | 2  | 43 | 51 |
| 334 | 334 | Partial_Sun | L4  | DSC | Wood   | 9  | 1  | 43 | 55 |
| 335 | 335 | Shade       | L7  | DSC | Wood   | 9  | 0  | 34 | 51 |
| 336 | 336 | Chamber     | CDC | DSC | Wood   | 9  | 2  | 44 | 49 |
| 337 | 337 | Full_Sun    | L2  | CTL | Cement | 9  | 0  | 0  | 39 |
| 338 | 338 | Partial_Sun | L5  | CTL | Cement | 9  | 0  | 0  | 57 |
| 339 | 339 | Shade       | L8  | CTL | Cement | 9  | 0  | 1  | 51 |
| 340 | 340 | Chamber     | CDC | CTL | Cement | 9  | 0  | 0  | 50 |
| 341 | 341 | Full_Sun    | L2  | DLT | Cement | 9  | 0  | 45 | 47 |
| 342 | 342 | Partial_Sun | L5  | DLT | Cement | 9  | 0  | 8  | 47 |
| 343 | 343 | Shade       | L8  | DLT | Cement | 9  | 0  | 3  | 43 |
| 344 | 344 | Chamber     | CDC | DLT | Cement | 9  | 0  | 29 | 47 |
| 345 | 345 | Full_Sun    | L2  | DSC | Cement | 9  | 2  | 53 | 53 |
| 346 | 346 | Partial_Sun | L5  | DSC | Cement | 9  | 3  | 50 | 50 |
| 347 | 347 | Shade       | L8  | DSC | Cement | 9  | 15 | 46 | 46 |
| 348 | 348 | Chamber     | CDC | DSC | Cement | 9  | 20 | 54 | 54 |
| 349 | 349 | Full_Sun    | L3  | CTL | Metal  | 9  | 0  | 2  | 51 |
| 350 | 350 | Partial_Sun | L6  | CTL | Metal  | 9  | 0  | 0  | 48 |
| 351 | 351 | Shade       | L9  | CTL | Metal  | 9  | 0  | 0  | 46 |
| 352 | 352 | Chamber     | CDC | CTL | Metal  | 9  | 1  | 0  | 46 |
| 353 | 353 | Full_Sun    | L3  | DLT | Metal  | 9  | 14 | 37 | 50 |
| 354 | 354 | Partial_Sun | L6  | DLT | Metal  | 9  | 9  | 40 | 41 |
| 355 | 355 | Shade       | L9  | DLT | Metal  | 9  | 6  | 34 | 49 |
| 356 | 356 | Chamber     | CDC | DLT | Metal  | 9  | 38 | 45 | 45 |
| 357 | 357 | Full_Sun    | L3  | DSC | Metal  | 9  | 46 | 50 | 50 |
| 358 | 358 | Partial_Sun | L6  | DSC | Metal  | 9  | 46 | 55 | 55 |
| 359 | 359 | Shade       | L9  | DSC | Metal  | 9  | 45 | 56 | 56 |
| 360 | 360 | Chamber     | CDC | DSC | Metal  | 9  | 54 | 58 | 58 |
| 361 | 361 | Full_Sun    | L1  | CTL | Wood   | 12 | 0  | 0  | 50 |
| 362 | 362 | Partial_Sun | L4  | CTL | Wood   | 12 | 0  | 0  | 50 |
| 363 | 363 | Shade       | L7  | CTL | Wood   | 12 | 0  | 0  | 47 |
| 364 | 364 | Chamber     | CDC | CTL | Wood   | 12 | 0  | 0  | 52 |
| 365 | 365 | Full_Sun    | L1  | DLT | Wood   | 12 | 0  | 4  | 52 |
| 366 | 366 | Partial_Sun | L4  | DLT | Wood   | 12 | 0  | 0  | 51 |
| 367 | 367 | Shade       | L7  | DLT | Wood   | 12 | 0  | 0  | 54 |
| 368 | 368 | Chamber     | CDC | DLT | Wood   | 12 | 0  | 14 | 52 |
| 369 | 369 | Full_Sun    | L1  | DSC | Wood   | 12 | 0  | 22 | 53 |
| 370 | 370 | Partial_Sun | L4  | DSC | Wood   | 12 | 0  | 20 | 52 |
| 371 | 371 | Shade       | L7  | DSC | Wood   | 12 | 0  | 16 | 53 |
| 372 | 372 | Chamber     | CDC | DSC | Wood   | 12 | 0  | 42 | 57 |
| 373 | 373 | Full_Sun    | L2  | CTL | Cement | 12 | 0  | 0  | 53 |
| 374 | 374 | Partial_Sun | L5  | CTL | Cement | 12 | 0  | 0  | 51 |
| 375 | 375 | Shade       | L8  | CTL | Cement | 12 | 0  | 0  | 51 |
| 376 | 376 | Chamber     | CDC | CTL | Cement | 12 | 0  | 0  | 47 |
| 377 | 377 | Full_Sun    | L2  | DLT | Cement | 12 | 0  | 21 | 57 |
| 378 | 378 | Partial_Sun | L5  | DLT | Cement | 12 | 0  | 4  | 46 |

```

379 379      Shade    L8      DLT  Cement    12    0    3    49
380 380      Chamber CDC     DLT  Cement    12    0   16   52
381 381      Full_Sun L2     DSC  Cement    12    2   51   51
382 382  Partial_Sun L5     DSC  Cement    12    0   48   48
383 383      Shade    L8     DSC  Cement    12    5   51   51
384 384      Chamber CDC     DSC  Cement    12    4   55   55
385 385      Full_Sun L3     CTL  Metal     12    0    0   40
386 386  Partial_Sun L6     CTL  Metal     12    0    0   45
387 387      Shade    L9     CTL  Metal     12    0    0   46
388 388      Chamber CDC     CTL  Metal     12    0    0   44
389 389      Full_Sun L3     DLT  Metal     12    0   33   56
390 390  Partial_Sun L6     DLT  Metal     12   10   56   59
391 391      Shade    L9     DLT  Metal     12    0   25   53
392 392      Chamber CDC     DLT  Metal     12   41   50   50
393 393      Full_Sun L3     DSC  Metal     12   38   44   44
394 394  Partial_Sun L6     DSC  Metal     12   32   43   44
395 395      Shade    L9     DSC  Metal     12   20   45   45
396 396      Chamber CDC     DSC  Metal     12   48   48   48
> model_24all <- glm(cbind(Dead24, Total-Dead24) ~ Exposure+Treatment+Surface+Time+Treatment*Surface
, family="binomial", data=mydata)
> summary(model_24all)

```

Call:

```

glm(formula = cbind(Dead24, Total - Dead24) ~ Exposure + Treatment +
     Surface + Time + Treatment * Surface, family = "binomial",
     data = mydata)

```

Deviance Residuals:

| Min      | 1Q      | Median | 3Q     | Max     |
|----------|---------|--------|--------|---------|
| -11.2437 | -1.1802 | 0.3491 | 1.5338 | 11.1055 |

Coefficients:

|                           | Estimate | Std. Error | z value | Pr(> z )     |
|---------------------------|----------|------------|---------|--------------|
| (Intercept)               | -4.29660 | 0.15819    | -27.161 | < 2e-16 ***  |
| ExposureFull_Sun          | -0.02439 | 0.07003    | -0.348  | 0.727593     |
| ExposurePartial_Sun       | -0.35449 | 0.06983    | -5.077  | 3.84e-07 *** |
| ExposureShade             | -0.70799 | 0.07041    | -10.055 | < 2e-16 ***  |
| TreatmentDLT              | 4.11564  | 0.14206    | 28.972  | < 2e-16 ***  |
| TreatmentDSC              | 8.66072  | 0.23903    | 36.233  | < 2e-16 ***  |
| SurfaceMetal              | -0.77347 | 0.23539    | -3.286  | 0.001017 **  |
| SurfaceWood               | -0.35655 | 0.20528    | -1.737  | 0.082402 .   |
| Time1                     | 1.27263  | 0.11103    | 11.462  | < 2e-16 ***  |
| Time2                     | 1.23620  | 0.11196    | 11.042  | < 2e-16 ***  |
| Time3                     | 0.94867  | 0.10858    | 8.737   | < 2e-16 ***  |
| Time4                     | 1.57433  | 0.11394    | 13.817  | < 2e-16 ***  |
| Time5                     | 1.31727  | 0.11037    | 11.935  | < 2e-16 ***  |
| Time6                     | 1.65628  | 0.11237    | 14.740  | < 2e-16 ***  |
| Time7                     | -0.04637 | 0.10983    | -0.422  | 0.672869     |
| Time8                     | -0.62442 | 0.11018    | -5.667  | 1.45e-08 *** |
| Time9                     | 0.43613  | 0.10877    | 4.010   | 6.08e-05 *** |
| Time12                    | -0.63230 | 0.10896    | -5.803  | 6.51e-09 *** |
| TreatmentDLT:SurfaceMetal | 3.30323  | 0.25321    | 13.045  | < 2e-16 ***  |
| TreatmentDSC:SurfaceMetal | 2.01176  | 0.46812    | 4.298   | 1.73e-05 *** |
| TreatmentDLT:SurfaceWood  | -0.82197 | 0.21632    | -3.800  | 0.000145 *** |
| TreatmentDSC:SurfaceWood  | -3.59995 | 0.28735    | -12.528 | < 2e-16 ***  |

---  
Signif. codes: 0 '\*\*\*' 0.001 '\*\*' 0.01 '\*' 0.05 '.' 0.1 ' ' 1

(Dispersion parameter for binomial family taken to be 1)

Null deviance: 20362.9 on 395 degrees of freedom  
Residual deviance: 3093.5 on 374 degrees of freedom  
AIC: 3815.1

Number of Fisher Scoring iterations: 6

```

> library(multcomp)
Loading required package: mvtnorm
Loading required package: survival
Loading required package: TH.data

```

Loading required package: MASS

Attaching package: 'TH.data'

The following object is masked from 'package:MASS':

geyser

```
> Tukey_exposure <-glht(model_24all, linfct=mcp(Exposure="Tukey"))
> summary(Tukey_exposure)
```

Simultaneous Tests for General Linear Hypotheses

Multiple Comparisons of Means: Tukey Contrasts

```
Fit: glm(formula = cbind(Dead24, Total - Dead24) ~ Exposure + Treatment +
  Surface + Time + Treatment * Surface, family = "binomial",
  data = mydata)
```

Linear Hypotheses:

|                             | Estimate | Std. Error | z value | Pr(> z )     |
|-----------------------------|----------|------------|---------|--------------|
| Full_Sun - Chamber == 0     | -0.02439 | 0.07003    | -0.348  | 0.985        |
| Partial_Sun - Chamber == 0  | -0.35449 | 0.06983    | -5.077  | < 1e-05 ***  |
| Shade - Chamber == 0        | -0.70799 | 0.07041    | -10.055 | < 1e-05 ***  |
| Partial_Sun - Full_Sun == 0 | -0.33010 | 0.06983    | -4.727  | 1.34e-05 *** |
| Shade - Full_Sun == 0       | -0.68360 | 0.07041    | -9.708  | < 1e-05 ***  |
| Shade - Partial_Sun == 0    | -0.35350 | 0.06964    | -5.076  | < 1e-05 ***  |

```
---
Signif. codes:  0 '***' 0.001 '**' 0.01 '*' 0.05 '.' 0.1 ' ' 1
(Adjusted p values reported -- single-step method)
```

```
> Tukey_treatment <-glht(model_24all, linfct=mcp(Treatment="Tukey"))
```

Warning message:

```
In mcp2matrix(model, linfct = linfct) :
  covariate interactions found -- default contrast might be inappropriate
> summary(Tukey_treatment)
```

Simultaneous Tests for General Linear Hypotheses

Multiple Comparisons of Means: Tukey Contrasts

```
Fit: glm(formula = cbind(Dead24, Total - Dead24) ~ Exposure + Treatment +
  Surface + Time + Treatment * Surface, family = "binomial",
  data = mydata)
```

Linear Hypotheses:

|                | Estimate | Std. Error | z value | Pr(> z )   |
|----------------|----------|------------|---------|------------|
| DLT - CTL == 0 | 4.1156   | 0.1421     | 28.97   | <2e-16 *** |
| DSC - CTL == 0 | 8.6607   | 0.2390     | 36.23   | <2e-16 *** |
| DSC - DLT == 0 | 4.5451   | 0.2014     | 22.57   | <2e-16 *** |

```
---
Signif. codes:  0 '***' 0.001 '**' 0.01 '*' 0.05 '.' 0.1 ' ' 1
(Adjusted p values reported -- single-step method)
```

```
> Tukey_surface <-glht(model_24all, linfct=mcp(Surface="Tukey"))
```

Warning message:

```
In mcp2matrix(model, linfct = linfct) :
  covariate interactions found -- default contrast might be inappropriate
> summary(Tukey_surface)
```

Simultaneous Tests for General Linear Hypotheses

Multiple Comparisons of Means: Tukey Contrasts

```
Fit: glm(formula = cbind(Dead24, Total - Dead24) ~ Exposure + Treatment +
  Surface + Time + Treatment * Surface, family = "binomial",
  data = mydata)
```



## Linear Hypotheses:

|                     | Estimate | Std. Error | z value | Pr(> z ) |    |
|---------------------|----------|------------|---------|----------|----|
| Metal - Cement == 0 | -0.7735  | 0.2354     | -3.286  | 0.00305  | ** |
| Wood - Cement == 0  | -0.3566  | 0.2053     | -1.737  | 0.19011  |    |
| Wood - Metal == 0   | 0.4169   | 0.2495     | 1.671   | 0.21504  |    |

---  
 Signif. codes: 0 '\*\*\*' 0.001 '\*\*' 0.01 '\*' 0.05 '.' 0.1 ' ' 1  
 (Adjusted p values reported -- single-step method)

```
> Tukey_time <-glht(model_24all, linfct=mcp(Time="Tukey"))
> summary(Tukey_time)
```

## Simultaneous Tests for General Linear Hypotheses

## Multiple Comparisons of Means: Tukey Contrasts

```
Fit: glm(formula = cbind(Dead24, Total - Dead24) ~ Exposure + Treatment +
  Surface + Time + Treatment * Surface, family = "binomial",
  data = mydata)
```

## Linear Hypotheses:

|                | Estimate | Std. Error | z value | Pr(> z ) |     |
|----------------|----------|------------|---------|----------|-----|
| 1 - 0.25 == 0  | 1.27263  | 0.11103    | 11.462  | <0.01    | *** |
| 2 - 0.25 == 0  | 1.23620  | 0.11196    | 11.042  | <0.01    | *** |
| 3 - 0.25 == 0  | 0.94867  | 0.10858    | 8.737   | <0.01    | *** |
| 4 - 0.25 == 0  | 1.57433  | 0.11394    | 13.817  | <0.01    | *** |
| 5 - 0.25 == 0  | 1.31727  | 0.11037    | 11.935  | <0.01    | *** |
| 6 - 0.25 == 0  | 1.65628  | 0.11237    | 14.740  | <0.01    | *** |
| 7 - 0.25 == 0  | -0.04637 | 0.10983    | -0.422  | 1.0000   |     |
| 8 - 0.25 == 0  | -0.62442 | 0.11018    | -5.667  | <0.01    | *** |
| 9 - 0.25 == 0  | 0.43613  | 0.10877    | 4.010   | <0.01    | **  |
| 12 - 0.25 == 0 | -0.63230 | 0.10896    | -5.803  | <0.01    | *** |
| 2 - 1 == 0     | -0.03644 | 0.11889    | -0.306  | 1.0000   |     |
| 3 - 1 == 0     | -0.32396 | 0.11617    | -2.789  | 0.1610   |     |
| 4 - 1 == 0     | 0.30170  | 0.12014    | 2.511   | 0.2970   |     |
| 5 - 1 == 0     | 0.04464  | 0.11717    | 0.381   | 1.0000   |     |
| 6 - 1 == 0     | 0.38365  | 0.11861    | 3.234   | 0.0474   | *   |
| 7 - 1 == 0     | -1.31900 | 0.11886    | -11.097 | <0.01    | *** |
| 8 - 1 == 0     | -1.89705 | 0.12000    | -15.809 | <0.01    | *** |
| 9 - 1 == 0     | -0.83650 | 0.11718    | -7.138  | <0.01    | *** |
| 12 - 1 == 0    | -1.90493 | 0.11893    | -16.017 | <0.01    | *** |
| 3 - 2 == 0     | -0.28753 | 0.11705    | -2.456  | 0.3301   |     |
| 4 - 2 == 0     | 0.33813  | 0.12104    | 2.793   | 0.1600   |     |
| 5 - 2 == 0     | 0.08107  | 0.11807    | 0.687   | 0.9998   |     |
| 6 - 2 == 0     | 0.42009  | 0.11954    | 3.514   | 0.0192   | *   |
| 7 - 2 == 0     | -1.28257 | 0.11975    | -10.711 | <0.01    | *** |
| 8 - 2 == 0     | -1.86061 | 0.12089    | -15.392 | <0.01    | *** |
| 9 - 2 == 0     | -0.80006 | 0.11807    | -6.776  | <0.01    | *** |
| 12 - 2 == 0    | -1.86849 | 0.11982    | -15.595 | <0.01    | *** |
| 4 - 3 == 0     | 0.62566  | 0.11852    | 5.279   | <0.01    | *** |
| 5 - 3 == 0     | 0.36860  | 0.11538    | 3.195   | 0.0540   | .   |
| 6 - 3 == 0     | 0.70761  | 0.11700    | 6.048   | <0.01    | *** |
| 7 - 3 == 0     | -0.99504 | 0.11660    | -8.534  | <0.01    | *** |
| 8 - 3 == 0     | -1.57309 | 0.11761    | -13.376 | <0.01    | *** |
| 9 - 3 == 0     | -0.51253 | 0.11503    | -4.456  | <0.01    | *** |
| 12 - 3 == 0    | -1.58096 | 0.11649    | -13.571 | <0.01    | *** |
| 5 - 4 == 0     | -0.25706 | 0.11931    | -2.155  | 0.5370   |     |
| 6 - 4 == 0     | 0.08196  | 0.12053    | 0.680   | 0.9999   |     |
| 7 - 4 == 0     | -1.62070 | 0.12156    | -13.333 | <0.01    | *** |
| 8 - 4 == 0     | -2.19875 | 0.12284    | -17.900 | <0.01    | *** |
| 9 - 4 == 0     | -1.13819 | 0.11977    | -9.503  | <0.01    | *** |
| 12 - 4 == 0    | -2.20662 | 0.12179    | -18.119 | <0.01    | *** |
| 6 - 5 == 0     | 0.33902  | 0.11776    | 2.879   | 0.1291   |     |
| 7 - 5 == 0     | -1.36364 | 0.11825    | -11.532 | <0.01    | *** |
| 8 - 5 == 0     | -1.94168 | 0.11945    | -16.255 | <0.01    | *** |
| 9 - 5 == 0     | -0.88113 | 0.11650    | -7.564  | <0.01    | *** |
| 12 - 5 == 0    | -1.94956 | 0.11836    | -16.471 | <0.01    | *** |
| 7 - 6 == 0     | -1.70266 | 0.12011    | -14.176 | <0.01    | *** |

```
8 - 6 == 0      -2.28070      0.12139 -18.788      <0.01 ***
9 - 6 == 0      -1.22015      0.11828 -10.316      <0.01 ***
12 - 6 == 0     -2.28858      0.12033 -19.020      <0.01 ***
8 - 7 == 0      -0.57805      0.11794 -4.901       <0.01 ***
9 - 7 == 0       0.48251      0.11677  4.132       <0.01 **
12 - 7 == 0     -0.58592      0.11679 -5.017       <0.01 ***
9 - 8 == 0       1.06055      0.11744  9.030       <0.01 ***
12 - 8 == 0     -0.00788      0.11647 -0.068      1.0000
12 - 9 == 0     -1.06843      0.11632 -9.185       <0.01 ***
```

---

```
Signif. codes:  0 '***' 0.001 '**' 0.01 '*' 0.05 '.' 0.1 ' ' 1
(Adjusted p values reported -- single-step method)
```

Warning messages:

```
1: In RET$pffunction("adjusted", ...) : Completion with error > abseps
2: In RET$pffunction("adjusted", ...) : Completion with error > abseps
3: In RET$pffunction("adjusted", ...) : Completion with error > abseps
4: In RET$pffunction("adjusted", ...) : Completion with error > abseps
5: In RET$pffunction("adjusted", ...) : Completion with error > abseps
6: In RET$pffunction("adjusted", ...) : Completion with error > abseps
7: In RET$pffunction("adjusted", ...) : Completion with error > abseps
>
```
